# Supplementary material for: Long-Term Outcomes of C3 Glomerulopathy and Immune-Complex Membranoproliferative Glomerulonephritis in Children
Source: PubMed Central journal article supplement — Kidney Int Rep. 2020 Oct 3;5(12):2313–24. doi: 10.1016/j.ekir.2020.09.019 (PMC7710848; doi:10.1016/j.ekir.2020.09.019), 2020-10-03
Supplement: mmc1.pdf [file mmc1.pdf]

## Supplementary Tables and Figures

|                                                                   | Total Cohort Male (n = 78) | Total Cohort Female (n = 87) | <i>p</i> -value | IC-MPGN Male (n = 21) | IC-MPGN Female (n = 21) | <i>p</i> -value | C3G Male (n = 15)     | C3G Female (n = 28)  | <i>p</i> -value |
|-------------------------------------------------------------------|----------------------------|------------------------------|-----------------|-----------------------|-------------------------|-----------------|-----------------------|----------------------|-----------------|
| <b>eGFR at Diagnosis (ml/min/1.73m<sup>2</sup>)</b>               | 62.9 (51.4 – 74.3)         | 80.6 (68.3 – 93.0)           | 0.0390*         | 88.2 (70.3 – 106.1)   | 65.1 (46.7 – 83.5)      | NS (0.0652)     | 57.0 (31.6 – 82.4)    | 99.8 (81.5 – 118.2)  | 0.0068*         |
| <b>eGFR at Last Follow-Up (ml/min/1.73m<sup>2</sup>)</b>          | 87.5 (77.1 – 97.9)         | 92.2 (82.0 – 106.4)          | NS (0.4097)     | 94.5 (82.8 – 106.2)   | 94.1 (72.5 – 115.6)     | NS (0.9694)     | 94.9 (62.6 – 127.3)   | 108.3 (90.7 – 125.9) | NS (0.4073)     |
| <b>Urine Protein/Creatinine Ratio at Diagnosis (mg/mmol)</b>      | 522.6 (233.7 – 811.6)      | 302.4 (158.3 – 446.5)        | NS (0.1529)     | 465.2 (31.2 – 899.1)  | 440.7 (178.5 – 703.0)   | NS (0.9166)     | 315.5 (133.7 – 497.2) | 382.6 (73.9 – 691.4) | NS (0.7637)     |
| <b>Urine Protein/Creatinine Ratio at Last Follow-Up (mg/mmol)</b> | 171.4 (35.9 – 306.9)       | 264.5 (67.1 – 461.9)         | NS (0.4484)     | 165.4 (44.1 – 286.8)  | 239.6 (-38.2 – 517.4)   | NS (0.5705)     | 79.2 (19.6 – 138.9)   | 138.5 (72.0 – 205.1) | NS (0.2534)     |
| <b>Hypertension at Diagnosis</b>                                  | 54.0%                      | 50.0%                        | NS (0.6394)     | 61.9%                 | 50.0%                   | NS (0.5359)     | 53.3%                 | 40.7%                | NS (0.5249)     |
| <b>Hypertension at Last Follow-Up</b>                             | 69.8%                      | 60.4%                        | NS (0.3944)     | 81.8%                 | 57.1%                   | NS (0.2337)     | 57.1%                 | 58.8%                | NS (>0.9999)    |
| <b>On Antihypertensives at Diagnosis</b>                          | 66.2%                      | 46.5%                        | 0.0165*         | 75.0%                 | 66.7%                   | NS (0.7337)     | 71.4%                 | 33.3%                | 0.0262*         |
| <b>On Antihypertensives at Last Follow-Up</b>                     | 59.7%                      | 69.8%                        | NS (0.1922)     | 76.2%                 | 66.7%                   | NS (0.7337)     | 66.7%                 | 78.6%                | NS (0.4732)     |
| <b>Antihypertensives Per Patient at Diagnosis</b>                 | 2.2 (1.8 – 2.6)            | 1.9 (1.5 – 2.4)              | NS (0.4186)     | 1.8 (0.96 – 2.6)      | 2.6 (1.7 – 3.6)         | NS (0.1633)     | 2.1 (1.2 – 3.0)       | 1.3 (0.5 – 2.1)      | NS (0.1726)     |
| <b>Antihypertensives Per Patient at Last Follow-Up</b>            | 1.8 (1.4 – 2.2)            | 1.5 (1.3 – 1.8)              | NS (0.3326)     | 1.8 (1.3 – 2.3)       | 1.8 (1.0 – 2.7)         | NS (0.8858)     | 1.3 (0.5 – 2.2)       | 1.2 (0.8 – 1.6)      | NS (0.7762)     |

Table S1.

|                                                                   | <b>Total Cohort Caucasian (n = 109)</b> | <b>Total Cohort non-Caucasian (n = 37)</b> | <b>p-value</b> | <b>IC-MPGN Caucasian (n = 27)</b> | <b>IC-MPGN non-Caucasian (n = 13)</b> | <b>p-value</b> | <b>C3G Caucasian (n = 22)</b> | <b>C3G non-Caucasian (n = 8)</b> | <b>p-value</b> |
|-------------------------------------------------------------------|-----------------------------------------|--------------------------------------------|----------------|-----------------------------------|---------------------------------------|----------------|-------------------------------|----------------------------------|----------------|
| <b>eGFR at Diagnosis (ml/min/1.73m<sup>2</sup>)</b>               | 68.2 (58.0 – 78.4)                      | 80.8 (61.6 – 99.9)                         | NS (0.2381)    | 63.6 (50.2 – 77.1)                | 97.1 (70.1 – 124.2)                   | 0.0116*        | 84.0 (64.7 – 103.3)           | 103.6 (55.6 – 151.6)             | NS (0.3155)    |
| <b>eGFR at Last Follow-Up (ml/min/1.73m<sup>2</sup>)</b>          | 89.2 (79.3 – 99.0)                      | 89.2 (73.2 – 105.2)                        | NS (0.9980)    | 89.3 (73.8 – 104.9)               | 99.0 (82.1 – 115.9)                   | NS (0.4457)    | 90.7 (71.1 – 110.3)           | 117.4 (77.0 – 157.7)             | NS (0.1640)    |
| <b>Urine Protein/Creatinine Ratio at Diagnosis (mg/mmol)</b>      | 448.8 (238.3 – 659.3)                   | 364.2 (104.8 – 623.5)                      | NS (0.7169)    | 446.6 (138.0 – 755.2)             | 533.1 (55.4 – 1122.0)                 | NS (0.7933)    | 433.7 (13.5 – 853.8)          | 515.6 (308.1 – 1339)             | NS (0.8259)    |
| <b>Urine Protein/Creatinine Ratio at Last Follow-Up (mg/mmol)</b> | 274.3 (95.9 – 452.7)                    | 121.5 (75.4 – 167.6)                       | NS (0.3623)    | 231.2 (55.0 – 407.5)              | 83.3 (25.9 – 140.6)                   | NS (0.3535)    | 111.4 (36.8 – 186.0)          | 211.3 (120.4 – 302.2)            | NS (0.1113)    |
| <b>Hypertension at Diagnosis</b>                                  | 49.5%                                   | 59.5%                                      | NS (0.3436)    | 59.3%                             | 53.8%                                 | NS (>0.9999)   | 36.4%                         | 62.5%                            | NS (0.2420)    |
| <b>Hypertension at Last Follow-Up</b>                             | 69.0%                                   | 76.0%                                      | NS (0.6043)    | 70.6%                             | 87.5%                                 | NS (0.6237)    | 87.5%                         | 71.4%                            | NS (0.5692)    |
| <b>On Antihypertensives at Diagnosis</b>                          | 54.1%                                   | 58.3%                                      | NS (0.7026)    | 70.4%                             | 66.7%                                 | NS (>0.9999)   | 40.9%                         | 50.0%                            | NS (0.6976)    |
| <b>On Antihypertensives at Last Follow-Up</b>                     | 67.0%                                   | 62.2%                                      | NS (0.6890)    | 74.1%                             | 61.5%                                 | NS (0.4760)    | 86.4%                         | 75.0%                            | NS (0.5894)    |
| <b>Antihypertensives/Patient at Diagnosis</b>                     | 2.4 (2.0 – 2.8)                         | 2.0 (1.4 – 2.5)                            | NS (0.2209)    | 2.3 (1.4 – 3.1)                   | 2.4 (1.2 – 3.6)                       | NS (0.8749)    | 2.9 (1.9 – 3.7)               | 1.0 (0.06 – 1.9)                 | 0.0078*        |
| <b>Antihypertensives/Patient at Last Follow-Up</b>                | 1.7 (1.5 – 2.0)                         | 2.1 (1.5 – 2.7)                            | NS (0.2404)    | 1.8 (1.2 – 2.5)                   | 1.9 (1.0 – 2.7)                       | NS (0.9320)    | 1.5 (0.9 – 2.1)               | 2.0 (0.48 – 3.5)                 | NS (0.4454)    |

**Table S2.**

# Survival Without eGFR < 30 mL/min/1.73m<sup>2</sup>, 50% Reduction in eGFR, or Kidney Replacement Therapy

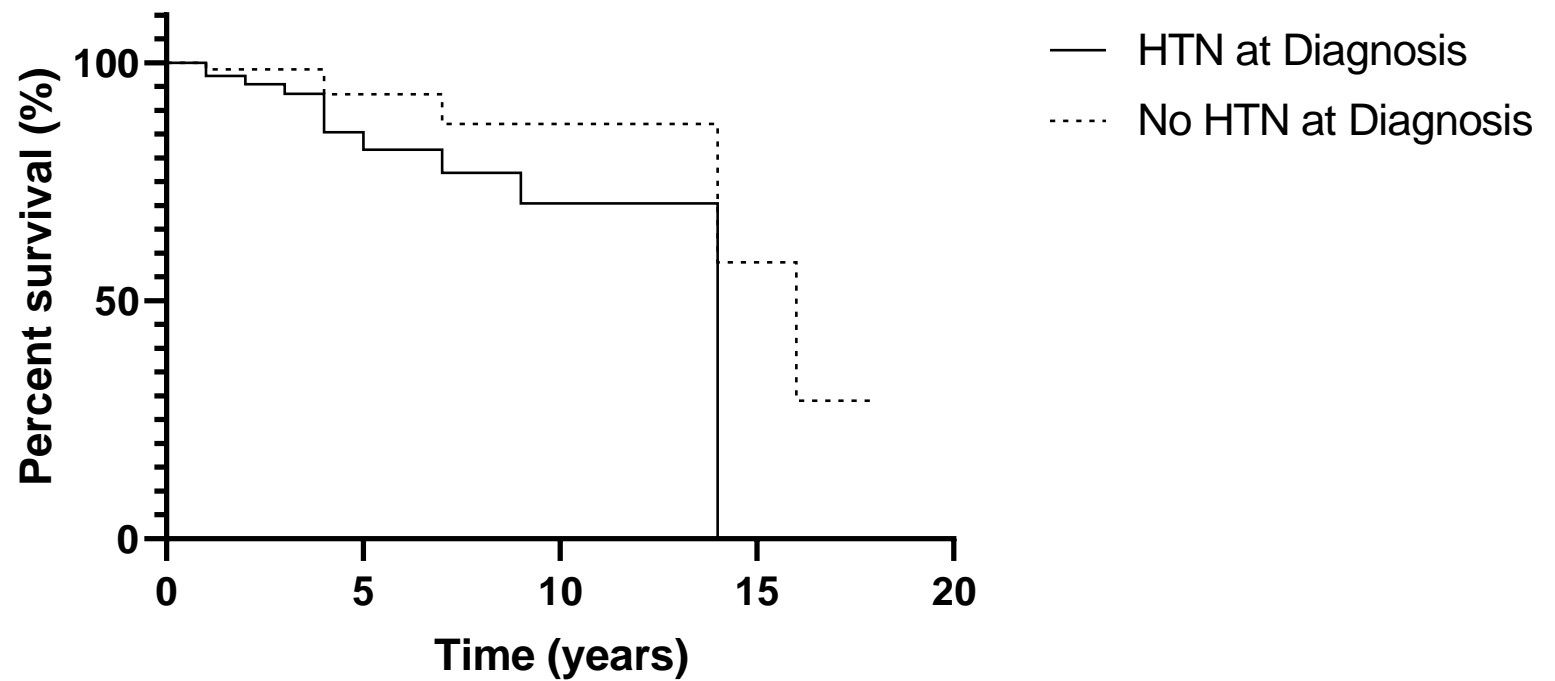

Figure S1.

## Strobe Checklist

| <b>Strobe Checklist Item Number</b> | <b>Manuscript Page</b> |
|-------------------------------------|------------------------|
| <b>Title and Abstract</b>           |                        |
| 1                                   | 2                      |
| <b>Introduction</b>                 |                        |
| 2                                   | 4-6                    |
| 3                                   | 5-6                    |
| <b>Methods</b>                      |                        |
| 4                                   | 6-7                    |
| 5                                   | 6-7                    |
| 6                                   | 6-7                    |
| 7                                   | 7-8                    |
| 8                                   | 7-8                    |
| 9                                   | 6-7                    |
| 10                                  | 6                      |
| 11                                  | 8                      |
| 12                                  | 8                      |
| <b>Results</b>                      |                        |
| 13                                  | 8-9                    |
| 14                                  | 9                      |
| 15                                  | 9-11                   |
| 16                                  | 9-11                   |
| 17                                  | 9-11                   |
| <b>Discussion</b>                   |                        |
| 18                                  | 11-12                  |
| 19                                  | 17-18                  |
| 20                                  | 11-18                  |
| 21                                  | 17-18                  |
